# Supplementary material
Source: publisher figshare collection journal article supplement (https://karger.figshare.com/articles/dataset/_/5121586)
Supplement: Supplementary file 1 [file 1]

Supplemental Table 1s. Analysis of the 18 loci investigated

| Near<br>telomere | Selective<br>Tiling<br>version<br>of probe<br>available | Region                    | Size    | Probe<br>Coverage<br>(bp) | Non-RM<br>Bases<br>(bp) | Pct<br>Masked | Num<br>Gaps | Median<br>Gap Size<br>(kb) | Max<br>Gap<br>Size<br>(bp) | Pct Probe<br>Coverage<br>across<br>whole<br>region | Pct Probe<br>Coverage<br>across only<br>Non-RM region |
|------------------|---------------------------------------------------------|---------------------------|---------|---------------------------|-------------------------|---------------|-------------|----------------------------|----------------------------|----------------------------------------------------|-------------------------------------------------------|
| yes              |                                                         | chr10:135142720-135266554 | 123,834 | 26,750                    | 40,282                  | 67%           | 43          | 405                        | 16661                      | 22%                                                | 66%                                                   |
|                  | yes                                                     | chr15:029818104-030297359 | 479,255 | 144,050                   | 200,065                 | 58%           | 263         | 354                        | 14652                      | 30%                                                | 72%                                                   |
| yes              | yes                                                     | chr16:000142049-000170588 | 28,539  | 15,850                    | 18,426                  | 35%           | 22          | 290                        | 1834                       | 56%                                                | 86%                                                   |
| yes              | yes                                                     | chr16:000155524-000171101 | 15,577  | 10,350                    | 11,640                  | 25%           | 12          | 152                        | 1702                       | 66%                                                | 89%                                                   |
|                  | yes                                                     | chr17:003490013-003535283 | 45,270  | 24,850                    | 29,054                  | 36%           | 33          | 361                        | 2028                       | 55%                                                | 86%                                                   |
|                  |                                                         | chr19:033058446-033091539 | 33,093  | 17,050                    | 18,372                  | 44%           | 15          | 379                        | 9516                       | 52%                                                | 93%                                                   |
|                  |                                                         | chr2:110219652-110316643  | 96,991  | 31,550                    | 39,227                  | 60%           | 49          | 306                        | 10462                      | 33%                                                | 80%                                                   |
| yes              |                                                         | chr2:242646152-242723252  | 77,100  | 8,050                     | 45,320                  | 41%           | 49          | 369                        | 3864                       | 10%                                                | 18%                                                   |
| yes              | yes                                                     | chr4:000041213-000103724  | 62,511  | 6,450                     | 22,028                  | 65%           | 36          | 477                        | 7482                       | 10%                                                | 29%                                                   |
| yes              |                                                         | chr4:001955027-001978148  | 23,121  | 8,550                     | 9,053                   | 61%           | 5           | 660                        | 1221                       | 37%                                                | 94%                                                   |
| yes              |                                                         | chr5:000074949-000191587  | 116,638 | 40,150                    | 59,620                  | 49%           | 58          | 226                        | 11887                      | 34%                                                | 67%                                                   |
| yes              |                                                         | chr5:000124704-000167026  | 42,322  | 29,750                    | 32,078                  | 24%           | 23          | 178                        | 3371                       | 70%                                                | 93%                                                   |
| yes              |                                                         | chr6:000174615-000284943  | 110,328 | 55,350                    | 63,183                  | 43%           | 80          | 244.5                      | 8350                       | 50%                                                | 88%                                                   |
|                  | yes                                                     | chr6:026292020-026298726  | 6,706   | 3,550                     | 4,582                   | 32%           | 6           | 318                        | 611                        | 53%                                                | 77%                                                   |
|                  |                                                         | chr8:116712325-116750490  | 38,165  | 28,750                    | 31,615                  | 17%           | 27          | 102                        | 2396                       | 75%                                                | 91%                                                   |
| yes              |                                                         | chr9:000210053-000285546  | 75,493  | 30,650                    | 36,950                  | 51%           | 65          | 309                        | 6708                       | 41%                                                | 83%                                                   |
|                  |                                                         | chr9:138270360-138349890  | 79,530  | 34,350                    | 36,865                  | 54%           | 25          | 289                        | 30523                      | 43%                                                | 93%                                                   |
|                  | yes                                                     | chrX:139312266-139343233  | 30,967  | 6,750                     | 7,677                   | 75%           | 8           | 1010                       | 12349                      | 22%                                                | 88%                                                   |

RM = Repeat Masked

**Supplemental Table 2. Results for Simple Tiling Probes for 18 Loci**

| <b>Locus</b>    | <b>Region<br/>size<br/>(kb)</b> | <b>Tile<br/>size<br/>(kb)</b> | <b>I</b> | <b>Sp</b>    | <b>Se</b>    | <b>Rep</b>   | <b>Values</b> |
|-----------------|---------------------------------|-------------------------------|----------|--------------|--------------|--------------|---------------|
| <b>Xq27.1*</b>  | <b>31</b>                       | <b>6.8</b>                    | <b>1</b> | <b>-----</b> | <b>-----</b> | <b>-----</b> | <b>1</b>      |
| <b>2q13</b>     | <b>97</b>                       | <b>32</b>                     | <b>1</b> | <b>5</b>     | <b>5</b>     | <b>5</b>     | <b>20</b>     |
| <b>2q37.3*</b>  | <b>77</b>                       | <b>8.0</b>                    | <b>4</b> | <b>5</b>     | <b>5</b>     | <b>5</b>     | <b>19</b>     |
| <b>4p16.3*</b>  | <b>63</b>                       | <b>6.5</b>                    | <b>2</b> | <b>5</b>     | <b>5</b>     | <b>5</b>     | <b>17</b>     |
| <b>4p16.3</b>   | <b>23</b>                       | <b>8.6</b>                    | <b>4</b> | <b>5</b>     | <b>5</b>     | <b>5</b>     | <b>19</b>     |
| <b>5p15.3</b>   | <b>117</b>                      | <b>40</b>                     | <b>5</b> | <b>5</b>     | <b>5</b>     | <b>5</b>     | <b>20</b>     |
| <b>5p15.3</b>   | <b>42</b>                       | <b>30</b>                     | <b>5</b> | <b>5</b>     | <b>5</b>     | <b>5</b>     | <b>20</b>     |
| <b>6p22.2</b>   | <b>6.7</b>                      | <b>3.6</b>                    | <b>1</b> | <b>-----</b> | <b>-----</b> | <b>-----</b> | <b>1</b>      |
| <b>6p25.3**</b> | <b>110</b>                      | <b>55</b>                     | <b>5</b> | <b>1</b>     | <b>5</b>     | <b>5</b>     | <b>16</b>     |
| <b>8q23.3</b>   | <b>38</b>                       | <b>29</b>                     | <b>3</b> | <b>5</b>     | <b>5</b>     | <b>5</b>     | <b>18</b>     |
| <b>9p24.3</b>   | <b>76</b>                       | <b>31</b>                     | <b>5</b> | <b>5</b>     | <b>5</b>     | <b>5</b>     | <b>20</b>     |
| <b>9q34.3</b>   | <b>80</b>                       | <b>34</b>                     | <b>5</b> | <b>5</b>     | <b>5</b>     | <b>5</b>     | <b>20</b>     |
| <b>10q23</b>    | <b>124</b>                      | <b>27</b>                     | <b>5</b> | <b>5</b>     | <b>5</b>     | <b>5</b>     | <b>20</b>     |
| <b>15q13.3*</b> | <b>479</b>                      | <b>144</b>                    | <b>5</b> | <b>5</b>     | <b>5</b>     | <b>5</b>     | <b>20</b>     |
| <b>16p13.3*</b> | <b>29</b>                       | <b>16</b>                     | <b>4</b> | <b>5</b>     | <b>5</b>     | <b>5</b>     | <b>19</b>     |
| <b>16p13.3*</b> | <b>16</b>                       | <b>10</b>                     | <b>4</b> | <b>5</b>     | <b>5</b>     | <b>5</b>     | <b>19</b>     |
| <b>17p13.3*</b> | <b>45</b>                       | <b>25</b>                     | <b>5</b> | <b>5</b>     | <b>5</b>     | <b>5</b>     | <b>20</b>     |
| <b>19q12</b>    | <b>33</b>                       | <b>17</b>                     | <b>4</b> | <b>5</b>     | <b>5</b>     | <b>5</b>     | <b>19</b>     |

**I = Intensity; Sp = Specificity; Se = Sensitivity; Rep = Reproducibility**

**\*Selective Tiling version of probe available    \*\*This locus represents a known polymorphic site and was shown to hybridize to two separate regions.**

**Supplemental Table 3: Results for Selective Tiling Probes in Seven Loci**

| <b>Locus</b>   | <b>Region<br/>size<br/>(kb)</b> | <b>Tile<br/>Size<br/>(kb)</b> | <b>I</b> | <b>Sp</b> | <b>Se</b> | <b>Rep</b> | <b>Value</b> |
|----------------|---------------------------------|-------------------------------|----------|-----------|-----------|------------|--------------|
| <b>6p22.2</b>  | <b>6.7</b>                      | <b>3.6</b>                    | <b>2</b> | <b>4</b>  | <b>4</b>  | <b>5</b>   | <b>15</b>    |
| <b>15q13.3</b> | <b>479</b>                      | <b>144</b>                    | <b>5</b> | <b>5</b>  | <b>5</b>  | <b>5</b>   | <b>20</b>    |
| <b>16p13.3</b> | <b>29</b>                       | <b>16</b>                     | <b>5</b> | <b>5</b>  | <b>5</b>  | <b>5</b>   | <b>20</b>    |
| <b>16p13.3</b> | <b>16</b>                       | <b>10</b>                     | <b>5</b> | <b>5</b>  | <b>5</b>  | <b>5</b>   | <b>20</b>    |
| <b>17p13.3</b> | <b>45</b>                       | <b>25</b>                     | <b>5</b> | <b>5</b>  | <b>5</b>  | <b>5</b>   | <b>20</b>    |
| <b>4p16.3</b>  | <b>63</b>                       | <b>8.6</b>                    | <b>3</b> | <b>5</b>  | <b>5</b>  | <b>5</b>   | <b>18</b>    |
| <b>Xq27.1</b>  | <b>31</b>                       | <b>6.8</b>                    | <b>3</b> | <b>5</b>  | <b>5</b>  | <b>1</b>   | <b>14</b>    |

**I = Intensity; Sp = Specificity; Se = Sensitivity; Rep = Reproducibility**

**Supplemental Table 4. Oligonucleotide-based FISH confirmed aCGH findings in 100% of samples tested**

| <b>Locus</b>   | <b>Array Findings</b> | <b>FISH Findings</b> |
|----------------|-----------------------|----------------------|
| <b>2q13</b>    | <b>Deletion</b>       | <b>Deletion</b>      |
| <b>2q37.3</b>  | <b>Deletion</b>       | <b>Deletion</b>      |
| <b>4p16.3</b>  | <b>Duplication</b>    | <b>Duplication</b>   |
| <b>4p16.3</b>  | <b>Deletion</b>       | <b>Deletion</b>      |
| <b>5p15.3</b>  | <b>Duplication</b>    | <b>Duplication</b>   |
| <b>5p13.3</b>  | <b>Duplication</b>    | <b>Duplication</b>   |
| <b>6p25.3</b>  | <b>Duplication</b>    | <b>Duplication</b>   |
| <b>9p24.3</b>  | <b>Duplication</b>    | <b>Duplication</b>   |
| <b>9q34.3</b>  | <b>Duplication</b>    | <b>Duplication</b>   |
| <b>10q26.3</b> | <b>Duplication</b>    | <b>Duplication</b>   |
| <b>15q13.3</b> | <b>Duplication</b>    | <b>Duplication</b>   |
